# Supplementary material for: A synthetic cycle for iminophosphorane synthesis involving direct intermolecular NP bond formation on N2-derived molybdenum nitride
Source: Royal Society of Chemistry journal article supplement (doi:10.1039/d3cc01925j), 2023-01-01
Supplement: d3cc01925j1.pdf [file d3cc01925j1.pdf]

## Supplementary Material for:

# A synthetic cycle for iminophosphorane synthesis involving directly intermolecular N=P bond formation on N<sub>2</sub>-derived molybdenum nitride

Li Jin<sup>a</sup>, Guoqiang Zhang<sup>a</sup>, Xiaoqin Yang<sup>b</sup>, Jinyi Song<sup>a</sup>, Jin Wang<sup>\*b</sup> and Qian Liao<sup>\*a</sup>

<sup>a</sup> Zhang Dayu School of Chemistry, Dalian University of Technology, No. 2 Linggong Rd., 116024 Dalian, Liaoning, China.

<sup>b</sup> School of Pharmacy, Jiangsu Province Engineering Research Center of Tumor Targeted Nano Diagnostic and Therapeutic Materials, Yancheng Teachers University, Yancheng, 224007, Jiangsu, China.

\*Email: liaoq@dlut.edu.cn; wangj01@yctu.edu.cn

|                                     |            |
|-------------------------------------|------------|
| <b>Experimental procedure</b> ..... | <b>S1</b>  |
| <b>NMR spectra</b> .....            | <b>S9</b>  |
| <b>X-ray diffraction data</b> ..... | <b>S18</b> |

**General considerations:** NMR spectra were measured on a Bruker 400 MHz spectrometer. <sup>31</sup>P chemical shifts were referenced to a phosphoric acid external standard at 25°C. IR spectra were recorded on IRTracer-100 from SHIMADZU. MALDI-TOF measurements were performed on a Bruker ultrafleXtreme equipped with a 355 nm nitrogen laser. HRMS measurements were performed on a Synapt G2-Si HDMS from Waters. EA was measured on UNICUBE from ELEMENTAR. CV spectra were recorded on a CHI660E electrochemical workstation, in a 0.1 M [<sup>n</sup>Bu<sub>4</sub>N][OTf]-solution, with a glassy carbon working electrode, a Pt wire as counter electrode and a Ag wire as reference electrode. All potentials were referenced to the redox couple of ferrocene. Reactions were carried out in a glovebox under N<sub>2</sub> unless stated. Sodium metals were washed with hexane and then with THF, and were stored in the glovebox. THF, THF-*d*<sub>8</sub>, 2-MeTHF, toluene and Et<sub>2</sub>O were distilled from sodium and other extra dry solvents were commercially available and used without further purification. (PNCNP)Mo(N)I (1),<sup>1</sup> 2,6-lutidinium iodide (LutHI)<sup>2</sup> were prepared according to the corresponding

literature. Mercury was degassed before use. <sup>n</sup>BuLi, trimethylamine (NEt<sub>3</sub>), PBu<sub>3</sub>, PMe<sub>3</sub>, PPhMe<sub>2</sub>, PPh<sub>2</sub>Me, PPh<sub>3</sub>, I<sub>2</sub>, Sn and chlorodiisopropylphosphine (<sup>i</sup>Pr<sub>2</sub>PCl), 15-crown-5, 1,10-phenanthroline (1,10-phen) were commercially available, and used as purchased. NMR yield was measured by integration vs an internal standard, PPh<sub>3</sub>, in a capillary.

**X-Ray diffraction** The crystal data of complex **2a**, **2b**, **3b** was collected using MoK $\alpha$  radiation (wavelength = 0.71073 Å) on Bruker Smart APEXII diffractometer. The crystal data of complexes **2c**, **4**, **6** were collected using CuK $\alpha$  radiation (wavelength = 1.54178 Å) on XtaLAB Synergy-R HyPix diffractometer. Crystals of **2a**, **2b**, **4** and **6** were mounted in inert oil and crystal structure determinations were effected at low temperature. Crystals of **2c** and **3b** were effected at ambient temperature. An empirical absorption correction with SADABS was applied.<sup>3</sup> The structures were solved using intrinsic phasing method (ShelXT)<sup>4</sup> and refined using the least-squares method on F<sup>2</sup> (ShelXL).<sup>5</sup> All non-H atoms were refined with anisotropic displacement parameters. X-ray crystallographic data have been deposited in the Cambridge Crystallographic Data Centre (<http://www.ccdc.cam.ac.uk/>) with reference numbers: 2255256 (**2a**), 2255257 (**2b**), 2255258 (**2c**), 2255259 (**3b**), 2255260 (**4**), 2255261 (**6**).

#### **Synthesis of [(PNCNP)Mo(N=PBu<sub>3</sub>)I]I (**2a**)**

A mixture of PBu<sub>3</sub> (23  $\mu$ L, 0.093 mmol) and I<sub>2</sub> (11.7 mg, 0.046 mmol) was added dropwise to (PNCNP)Mo(N)I (**1**) (54 mg, 0.093 mmol) in DCM (~5 mL), affording a deep red solution immediately. After overnight at room temperature, the formation of **2a** was observed by *in situ* NMR of the solution. NMR yield: 69%. Solvent was removed under vacuum, the oily product was washed with toluene and 1,4-dioxane. Red crystals of **2a** were obtained by diffusion of *n*-hexane into its DCM solution. Isolated yield: 46.1 mg, 50%. <sup>1</sup>H NMR (400 MHz, CD<sub>3</sub>CN):  $\delta$  = 7.08 (t, <sup>3</sup>J<sub>H-H</sub> = 7.8 Hz, 1H, Ar-*H*<sup>PNCNP ligand</sup>), 6.50 (d, <sup>3</sup>J<sub>H-H</sub> = 7.8 Hz, 2H, Ar-*H*<sup>PNCNP ligand</sup>), 6.26 (s, 2H, NH), 2.82 (pseudo p, <sup>3</sup>J<sub>H-H</sub> = 7.6 Hz, 2H, P(CH(CH<sub>3</sub>)<sub>2</sub>)<sub>2</sub>), 2.52-2.46 (m, 2H, P(CH(CH<sub>3</sub>)<sub>2</sub>)<sub>2</sub>),

1.81-1.74 (m, 6H, P(CH(CH<sub>3</sub>)<sub>2</sub>)<sub>2</sub>), 1.66-1.55 (m, 12H, P(CH(CH<sub>3</sub>)<sub>2</sub>)<sub>2</sub>), 1.29-1.21 (m, 18H, P(CH<sub>2</sub>CH<sub>2</sub>CH<sub>2</sub>CH<sub>3</sub>)<sub>3</sub>), 0.83 (pseudo t, <sup>3</sup>J<sub>H-H</sub> = 6.5 Hz, 9H, P(CH<sub>2</sub>CH<sub>2</sub>CH<sub>2</sub>CH<sub>3</sub>)<sub>3</sub>), 0.75 (q, <sup>3</sup>J<sub>P-H</sub> = 14.6 Hz, <sup>3</sup>J<sub>H-H</sub> = 7.3 Hz, 6H, P(CH(CH<sub>3</sub>)<sub>2</sub>)<sub>2</sub>) ppm (Figure S1); <sup>31</sup>P{H} NMR (162 MHz, CD<sub>3</sub>CN): δ = 140.6 (s, 2P), 57.8 (s, 1P) ppm (Figure S2). MS (MALDI-TOF, *m/z*): 780.2 [Cation]<sup>+</sup>. Anal: calcd for C<sub>30</sub>H<sub>60</sub>N<sub>3</sub>I<sub>2</sub>P<sub>3</sub>Mo: C 39.79, H 6.68, N 4.64; found: C 39.78, H 6.74, N 4.64.

### Synthesis of [(PNCNP)Mo(N=PPhMe<sub>2</sub>)I]I (**2b**)

A mixture of PPhMe<sub>2</sub> (8.1 μL, 0.057 mmol) and I<sub>2</sub> (7.1 mg, 0.028 mmol) was added dropwise to the DCM (~4 mL) solution of (PNCNP)Mo(N)I (**1**) (33 mg, 0.057 mmol), producing a red precipitate immediately. After overnight, the supernatant was removed, and the red powder of [(PNCNP)Mo(N=PPhMe<sub>2</sub>)I]I (**2b**) was washed with Et<sub>2</sub>O and then dried. Isolated yield: 27.4 mg, 57%. Single crystals of complex **2b** suitable for X-ray diffraction were obtained by vapor diffusion of *n*-hexane into its DCM solution at room temperature. <sup>1</sup>H NMR (400 MHz, CD<sub>3</sub>CN): δ = 7.69-7.65 (m, 1H, CH<sup>Ph</sup>), 7.55-7.46 (m, 4H, CH<sup>Ph</sup>), 7.08 (t, <sup>3</sup>J<sub>H-H</sub> = 7.9 Hz, 1H, Ar-*H*<sup>PNCNP ligand</sup>), 6.50 (d, <sup>3</sup>J<sub>H-H</sub> = 7.8 Hz, 2H, Ar-*H*<sup>PNCNP ligand</sup>), 6.02 (s, 2H, NH), 2.79-2.70 (m, 2H, P(CH(CH<sub>3</sub>)<sub>2</sub>)<sub>2</sub>), 2.13-2.03 (m, 2H, P(CH(CH<sub>3</sub>)<sub>2</sub>)<sub>2</sub>), 2.05 (d, <sup>2</sup>J<sub>P-H</sub> = 13.7 Hz, 6H, P(CH<sub>3</sub>)<sub>2</sub>), 1.36-1.24 (m, 18H, P(CH(CH<sub>3</sub>)<sub>2</sub>)<sub>2</sub>), 1.03-0.98 (m, 6H, P(CH(CH<sub>3</sub>)<sub>2</sub>)<sub>2</sub>) ppm (Figure S3); <sup>31</sup>P{H} NMR (162 MHz, CD<sub>3</sub>CN): δ = 136.8 (s, 2P), 38.2 (s, 1P) ppm (Figure S4). MS (MALDI-TOF, *m/z*): 716.1 [Cation]<sup>+</sup>. Anal: calcd for C<sub>26</sub>H<sub>44</sub>N<sub>3</sub>I<sub>2</sub>P<sub>3</sub>Mo: C 37.12, H 5.27, N 4.99; found: C 37.06, H 5.29, N 4.99.

### Synthesis of [(PNCNP)Mo(N=PPh<sub>2</sub>Me)I]I (**2c**)

Following the procedure of complex **2a**, complex **2c** was synthesized by the reaction of PPh<sub>2</sub>Me (17 μL, 0.093 mmol), I<sub>2</sub> (12 mg, 0.046 mmol) and (PNCNP)Mo(N)I (**1**) (54 mg, 0.093 mmol) in DCM (~5 mL). NMR yield: 60%. Single crystals of complex **2c** suitable for X-ray diffraction were obtained by diffusion *n*-hexane into DCM solution at room temperature. Isolated yield: 26.3 mg, 31%. <sup>1</sup>H NMR (400 MHz, CD<sub>3</sub>CN): δ =

7.70 (t,  $^3J_{\text{H-H}} = 7.3$  Hz, 1H,  $\text{CH}^{\text{Ph}}$ ), 7.70 (t,  $^3J_{\text{H-H}} = 7.3$  Hz, 1H,  $\text{CH}^{\text{Ph}}$ ), 7.51 (t,  $^3J_{\text{H-H}} = 7.8$  Hz, 2H,  $\text{CH}^{\text{Ph}}$ ), 7.50 (t,  $^3J_{\text{H-H}} = 7.8$  Hz, 2H,  $\text{CH}^{\text{Ph}}$ ), 7.45 (d,  $^3J_{\text{H-H}} = 7.8$  Hz, 2H,  $\text{CH}^{\text{Ph}}$ ), 7.41 (d,  $^3J_{\text{H-H}} = 7.8$  Hz, 2H,  $\text{CH}^{\text{Ph}}$ ), 7.14 (t,  $^3J_{\text{H-H}} = 7.9$  Hz, 1H, Ar- $H^{\text{PNCNP}}$  ligand), 6.56 (d,  $^3J_{\text{H-H}} = 7.8$  Hz, 2H, Ar- $H^{\text{PNCNP}}$  ligand), 6.10 (s, 2H, NH), 2.78-2.70 (m, 2H,  $\text{PCH}(\text{CH}_3)_2$ ), 2.39 (d,  $^2J_{\text{P-H}} = 13.4$  Hz, 3H,  $\text{PCH}_3$ ), 1.95-1.85 (m, 2H,  $\text{PCH}(\text{CH}_3)_2$ ), 1.26 (q,  $^3J_{\text{P-H}} = 14.4$  Hz,  $^3J_{\text{H-H}} = 7.2$  Hz, 6H,  $\text{P}(\text{CH}(\text{CH}_3)_2)_2$ ), 1.19-1.09 (m, 12H,  $\text{P}(\text{CH}(\text{CH}_3)_2)_2$ ), 0.91 (q,  $^3J_{\text{P-H}} = 14.4$  Hz,  $^3J_{\text{H-H}} = 7.2$  Hz, 6H,  $\text{P}(\text{CH}(\text{CH}_3)_2)_2$ ) ppm (Figure S5);  $^{31}\text{P}\{\text{H}\}$  NMR (162 MHz,  $\text{CD}_3\text{CN}$ ):  $\delta = 137.3$  (s, 2P), 32.2 (s, 1P) ppm (Figure S6). MS (MALDI-TOF,  $m/z$ ): 778.1 [Cation] $^+$ . Anal: calcd for  $\text{C}_{31}\text{H}_{46}\text{N}_3\text{I}_2\text{P}_3\text{Mo}$ : C 41.21, H 5.13, N 4.65; found: C 41.25, H 5.23, N 4.85.

### Synthesis of [(PNCNP)Mo(N=PMe<sub>3</sub>)I]I (2d)

Following the procedure of complex **2a**, complex **2d** was synthesized by the reaction of  $\text{PMe}_3$  (20.6  $\mu\text{L}$ , 0.20 mmol),  $\text{I}_2$  (25.4 mg, 0.10 mmol) and (PNCNP)Mo(N)I (**1**) (116 mg, 0.20 mmol) in DCM (~6 mL). Crystals of complex **2d** were obtained by diffusion *n*-hexane into DCM solution at room temperature. Isolated yield: 73.6 mg, 47%.  $^1\text{H}$  NMR (400 MHz,  $\text{CD}_3\text{CN}$ ):  $\delta = 7.04$  (t,  $^3J_{\text{H-H}} = 7.8$  Hz, 1H, Ar- $H^{\text{PNCNP}}$  ligand), 6.47 (d,  $^3J_{\text{H-H}} = 7.8$  Hz, 2H, Ar- $H^{\text{PNCNP}}$  ligand), 5.98 (s, 2H, NH), 2.80 (br s, 2H,  $\text{PCH}(\text{CH}_3)_2$ ), 2.47 (br s, 2H,  $\text{PCH}(\text{CH}_3)_2$ ), 1.80 (d,  $^2J_{\text{P-H}} = 13.8$  Hz, 9H,  $\text{P}(\text{CH}_3)_3$ ), 1.50-1.45 (m, 6H,  $\text{P}(\text{CH}(\text{CH}_3)_2)_2$ ), 1.42-1.37 (m, 6H,  $\text{P}(\text{CH}(\text{CH}_3)_2)_2$ ), 1.30-1.24 (m, 6H,  $\text{P}(\text{CH}(\text{CH}_3)_2)_2$ ), 1.06-1.00 (m, 6H,  $\text{P}(\text{CH}(\text{CH}_3)_2)_2$ ) ppm (Figure S7);  $^{31}\text{P}\{\text{H}\}$  NMR (162 MHz,  $\text{CD}_3\text{CN}$ ):  $\delta = 137.0$  (s, 2P), 44.6 (s, 1P) ppm (Figure S8). MS (MALDI-TOF,  $m/z$ ): 654.1 [Cation] $^+$ . Anal: calcd for  $\text{C}_{21}\text{H}_{42}\text{N}_3\text{I}_2\text{P}_3\text{Mo}$ : C 32.37, H 5.43, N 5.39; found: C 32.29, H 5.35, N 5.53.

### Synthesis of [Me<sub>2</sub>PhP=NH<sub>2</sub>]I (3b) and (PNCNP)Mo(CO)<sub>3</sub>I (4) from 2b

Sn (18 mg, 0.15 mmol) powder and LutHI (14 mg, 0.06 mmol) were added to the suspension of [(PNCNP)Mo(N=PPhMe<sub>2</sub>)I]I (**2b**) (25 mg, 0.03 mmol) in DCM (2 mL) at room temperature. CO was bubbled into the suspension then the mixture was stirred

vigorously for 6 h, resulting in a dark red clear solution. Formation of [Me<sub>2</sub>PhP=NH<sub>2</sub>]I (**3b**) and (PNCNP)Mo(CO)<sub>3</sub>I (**4**) were observed and quantified by <sup>31</sup>P{H} NMR in 64% yield and 85% yield respectively. After the solvent was removed under vacuum, the residues were extracted with toluene. The toluene extraction containing complex **4** was taken to dryness. Crystals of **4** were obtained by diffusion of *n*-hexane into its DCM solution. To the above residues that insoluble in toluene, DCM and 1,10-phen (0.03 mmol, 5.4 mg) was added. Red precipitate was separated and the filtrate was dried under vacuum to give **3b** as an oil which could be recrystallized in hot toluene.

**(PNCNP)Mo(CO)<sub>3</sub>I (4):**

Isolated yield: 5.8 mg, 30%. <sup>1</sup>H NMR (400 MHz, THF-*d*<sub>8</sub>): δ = 6.60 (t, <sup>3</sup>J<sub>H-H</sub> = 7.6 Hz, 1H, Ar-*H*<sup>PNCNP ligand</sup>), 6.18 (d, <sup>3</sup>J<sub>H-H</sub> = 7.6 Hz, 2H, Ar-*H*<sup>PNCNP ligand</sup>), 5.61 (s, 2H, NH), 2.74-2.65 (m, 4H, P(CH(CH<sub>3</sub>)<sub>2</sub>)<sub>2</sub>), 1.35 (dd, <sup>3</sup>J<sub>P-H</sub> = 15.6 Hz, <sup>3</sup>J<sub>H-H</sub> = 7.1 Hz, 12H, P(CH(CH<sub>3</sub>)<sub>2</sub>)<sub>2</sub>), 1.24 (dd, <sup>3</sup>J<sub>P-H</sub> = 13.0 Hz, <sup>3</sup>J<sub>H-H</sub> = 7.0 Hz, 12H, P(CH(CH<sub>3</sub>)<sub>2</sub>)<sub>2</sub>) ppm (Figure S9); <sup>31</sup>P{H} NMR (162 MHz, THF-*d*<sub>8</sub>): δ = 120.7 ppm (Figure S10). IR (in DCM): 2018, 1948, 1913 cm<sup>-1</sup> (ν<sub>CO</sub>). Anal: calcd for C<sub>21</sub>H<sub>33</sub>N<sub>2</sub>O<sub>3</sub>IMoP<sub>2</sub>: C 39.03, H 5.15, N 4.33; found: C 38.91, H 5.11, N 4.32.

**[Me<sub>2</sub>PhP=NH<sub>2</sub>]I (3b):**

Isolated yield: 4.7 mg, 56%. <sup>1</sup>H NMR (400 MHz, CD<sub>3</sub>CN): δ = 7.95-7.89 (m, 2H, CH<sup>Ph</sup>), 7.79-7.74 (m, 1H, CH<sup>Ph</sup>), 7.70-7.64 (m, 2H, CH<sup>Ph</sup>), 4.43 (s, 2H, NH<sub>2</sub>), 2.17 (d, <sup>2</sup>J<sub>P-H</sub> = 14.4 Hz, 6H, P(CH<sub>3</sub>)<sub>2</sub>) ppm (Figure S11); <sup>13</sup>C{H} NMR (100.63 MHz, CD<sub>3</sub>CN): δ = 135.2 (s, PC<sup>Ph</sup>), 131.8 (d, <sup>3</sup>J<sub>P-C</sub> = 11.6 Hz, PC<sup>Ph</sup>), 130.4 (d, <sup>2</sup>J<sub>P-C</sub> = 13.3 Hz, PC<sup>Ph</sup>), 126.6 (d, <sup>1</sup>J<sub>P-C</sub> = 97.5 Hz, PC<sup>Ph</sup>), 13.51 (d, <sup>1</sup>J<sub>P-C</sub> = 68.2 Hz, P(CH<sub>3</sub>)<sub>2</sub>) ppm (Figure S12); <sup>31</sup>P{H} NMR (162 MHz, CD<sub>3</sub>CN): δ = 45.5 (s, 1P) ppm (Figure S13). HRMS (ESI, *m/z*): calcd for C<sub>8</sub>H<sub>13</sub>NP: 154.0786 [Cation]<sup>+</sup>; found: 154.0778. Anal: calcd for C<sub>8</sub>H<sub>13</sub>NIP: C 34.19, H 4.66, N 4.98; found: C 34.37, H 4.62, N 4.73.

**Synthesis of [Bu<sub>3</sub>P=NH<sub>2</sub>]I (3a) from 2a**

Sn (9 mg, 0.075 mmol) and LutHI (7 mg, 0.03 mmol) were added into the DCM (1 mL) solution of [(PNCNP)Mo(N=PBu<sub>3</sub>)I]I (**2a**) (14 mg, 0.015 mmol) at room temperature.

CO was bubbled into the solution then the mixture was stirred vigorously for 6 h. Formation of  $[\text{Bu}_3\text{P}=\text{NH}_2]\text{I}$  (**3a**) and  $(\text{PNCNP})\text{Mo}(\text{CO})_3\text{I}$  (**4**) were observed and quantified by  $^{31}\text{P}\{\text{H}\}$  NMR in 50% and 88% yield respectively. After the solvent was removed under vacuum, the residues were extracted with toluene.  $[\text{Bu}_3\text{P}=\text{NH}_2]\text{I}$  (**3a**) was obtained from column chromatography on neutral  $\text{Al}_2\text{O}_3$  with MeOH as eluent, as colorless oil. Isolated yield: 2.1 mg, 43%.  $^1\text{H}$  NMR (400 MHz,  $\text{CD}_3\text{CN}$ ):  $\delta = 4.09$  (s, 2H,  $\text{NH}_2$ ), 2.18-2.11 (m, 6H,  $\text{P}(\text{CH}_2(\text{CH}_2)_2\text{CH}_3)_3$ ), 1.61-1.51 (m, 6H,  $\text{P}(\text{CH}_2\text{CH}_2\text{CH}_2\text{CH}_3)_3$ ), 1.44 (sextet,  $^3J_{\text{H-H}} = 7.2$  Hz, 6H,  $\text{P}((\text{CH}_2)_2\text{CH}_2\text{CH}_3)_3$ ), 0.93 (t,  $^3J_{\text{H-H}} = 7.2$  Hz, 9H,  $\text{P}((\text{CH}_2)_3\text{CH}_3)_3$ ) ppm (Figure S14);  $^{13}\text{C}\{\text{H}\}$  NMR (100.63 MHz,  $\text{CD}_3\text{CN}$ ):  $\delta = 24.2$  (d,  $^3J_{\text{P-C}} = 16.1$  Hz,  $\text{P}((\text{CH}_2)_2\text{CH}_2\text{CH}_3)_3$ ), 23.6 (d,  $^1J_{\text{P-C}} = 59.5$  Hz,  $\text{P}(\text{CH}_2(\text{CH}_2)_2\text{CH}_3)_3$ ), 23.5 (d,  $^2J_{\text{P-C}} = 3.9$  Hz,  $\text{P}(\text{CH}_2\text{CH}_2\text{CH}_2\text{CH}_3)_3$ ), 13.6 (s,  $\text{P}((\text{CH}_2)_3\text{CH}_3)_3$ ) ppm (Figure S15);  $^{31}\text{P}\{\text{H}\}$  NMR (162 MHz,  $\text{CD}_3\text{CN}$ ):  $\delta = 58.0$  (s, 1P) ppm (Figure S16). HRMS (ESI,  $m/z$ ): calcd for  $\text{C}_{12}\text{H}_{29}\text{NP}$ : 218.2038 [ $\text{Cation}$ ] $^+$ ; found: 218.2029. Anal: calcd for  $\text{C}_{12}\text{H}_{29}\text{NIP}$ : C 41.75, H 8.47, N 4.06; found: C 41.56, H 8.39, N 4.03.

### Synthesis of $[\text{MePh}_2\text{P}=\text{NH}_2]\text{I}$ (**3c**) from **2c**

Sn (18 mg, 0.15 mmol) and LutHI (14 mg, 0.06 mmol) were added into the DCM (2 mL) solution of  $(\text{PNCNP})\text{Mo}(\text{N}=\text{PPh}_2\text{Me})\text{I}$  (**2c**) (27 mg, 0.03 mmol) at room temperature. CO was bubbled into the solution then the mixture was stirred vigorously for 6 h. Formation of  $[\text{MePh}_2\text{P}=\text{NH}_2]\text{I}$  (**3c**) and  $(\text{PNCNP})\text{Mo}(\text{CO})_3\text{I}$  (**4**) were observed and quantified by  $^{31}\text{P}\{\text{H}\}$  NMR in 64% and 86% yield respectively. Following the work-up procedure of **3b**,  $[\text{MePh}_2\text{P}=\text{NH}_2]\text{I}$  (**3c**) was isolated as white powder. Isolated yield: 6.0 mg, 58%.  $^1\text{H}$  NMR (400 MHz,  $\text{CD}_3\text{CN}$ ):  $\delta = 7.85$ -7.79 (m, 6H,  $\text{CH}^{\text{Ph}}$ ), 7.70-7.65 (m, 4H,  $\text{CH}^{\text{Ph}}$ ), 4.72 (s, 2H,  $\text{NH}_2$ ), 2.47 (d,  $^2J_{\text{P-H}} = 14.2$  Hz, 3H,  $\text{PCH}_3$ ) ppm (Figure S17);  $^{13}\text{C}\{\text{H}\}$  NMR (100.63 MHz,  $\text{CD}_3\text{CN}$ ):  $\delta = 135.6$  (d,  $^4J_{\text{P-C}} = 3.1$  Hz,  $\text{PC}^{\text{Ph}}$ ), 132.9 (d,  $^3J_{\text{P-C}} = 11.6$  Hz,  $\text{PC}^{\text{Ph}}$ ), 130.5 (d,  $^2J_{\text{P-C}} = 13.4$  Hz,  $\text{PC}^{\text{Ph}}$ ), 124.9 (d,  $^1J_{\text{P-C}} = 101.3$  Hz,  $\text{PC}^{\text{Ph}}$ ), 12.8 (d,  $^1J_{\text{P-C}} = 69.7$  Hz,  $\text{PCH}_3$ ) ppm (Figure S18);  $^{31}\text{P}\{\text{H}\}$  NMR (162 MHz,  $\text{CD}_3\text{CN}$ ):  $\delta = 40.4$  (s, 1P) ppm (Figure S19). HRMS (ESI,  $m/z$ ): calcd for  $\text{C}_{13}\text{H}_{15}\text{NP}$ :

216.0942 [Cation]<sup>+</sup>; found: 216.0935. Anal: calcd for C<sub>13</sub>H<sub>15</sub>NIP: C 45.50, H 4.41, N 4.08; found: C 45.51, H 4.43, N 4.07.

#### Synthesis of [Me<sub>3</sub>P=NH<sub>2</sub>]I (**3d**)<sup>6</sup> from **2d**

Sn (18 mg, 0.15 mmol) and LutHI (14 mg, 0.06 mmol) were added into the DCM (2 mL) solution of [(PNCNP)Mo(N=PMe<sub>3</sub>)I]I (**2d**) (23 mg, 0.03 mmol) at room temperature. CO was bubbled into the solution then the mixture was stirred vigorously for 6 h. The formation of (PNCNP)Mo(CO)<sub>3</sub>I (**4**) were observed and quantified by <sup>31</sup>P{H} NMR in 87% yield. Following the work-up procedure of **3b**, [Me<sub>3</sub>P=NH<sub>2</sub>]I (**3d**) was isolated as white powder. Isolated yield: 5.5 mg, 84%. <sup>1</sup>H NMR (400 MHz, CD<sub>3</sub>CN): δ = 3.99 (s, 2H, NH<sub>2</sub>), 1.89 (d, <sup>2</sup>J<sub>P-H</sub> = 14.6 Hz, 9H, P(CH<sub>3</sub>)<sub>3</sub>) ppm (Figure S20); <sup>13</sup>C{H} NMR (100.63 MHz, CD<sub>3</sub>CN): δ = 14.1 (d, <sup>1</sup>J<sub>P-C</sub> = 66.1 Hz, P(CH<sub>3</sub>)<sub>3</sub>) ppm (Figure S21); <sup>31</sup>P{H} NMR (162 MHz, CD<sub>3</sub>CN): δ = 51.9 (s, 1P) ppm (Figure S22). HRMS (ESI, *m/z*): calcd for C<sub>3</sub>H<sub>11</sub>NP: 92.0629 [Cation]<sup>+</sup>; found: 92.0622.

#### Synthesis of (PNCNP)MoI<sub>3</sub> (**5**) from decarbonylation of **4**

To the solution of (PNCNP)Mo(CO)<sub>3</sub>I (**4**) (26 mg, 0.04 mmol) in Et<sub>2</sub>O (8 mL) was added I<sub>2</sub> (10 mg, 0.04 mmol). The mixture was stirred for 5 min at room temperature. The resulted brown cloudy suspension was irradiated with LED (365 nm) under reduced pressure, affording dark purple precipitate within 5 min. The precipitate was collected and washed with Et<sub>2</sub>O, then dried under vacuum. This powder of complex (PNCNP)MoI<sub>3</sub> (**5**) was essentially pure for both EA and further reaction. Crystals of **5** was obtained from concentrated DCM solution under -30 °C.<sup>1</sup> Isolated yield: 16.0 mg, 49%. MS (MALDI-TOF, *m/z*): 691.0 [M-I]<sup>+</sup>. Anal: calcd for C<sub>18</sub>H<sub>33</sub>I<sub>3</sub>MoN<sub>2</sub>P<sub>2</sub>: C 26.49, H 4.08, N 3.43; found: C 26.48, H 4.08, N 3.27.

#### Synthesis of [Na(15-crown-5)(THF)][(PNCNP)MoI<sub>3</sub>] (**6**)

To a deep violet solution of (PNCNP)MoI<sub>3</sub> (**5**) (16 mg, 0.019 mmol) in 2-MeTHF (1 mL) at 0 °C was added 15-crown-5 (4 μL, 0.019 mmol) and freshly prepared sodium

amalgam (44 mg, 1 wt%, 0.019 mmol). The mixture was stirred vigorously for 30 min, producing a yellow precipitate and an orange-red supernatant. The precipitate was separated, washed with Et<sub>2</sub>O and dried under vacuum. Isolated yield: 20 mg, 88%. Single crystals of complex **6** suitable for X-ray diffraction were obtained by vapor diffusion of Et<sub>2</sub>O into the THF solution. MS (MALDI-TOF, *m/z*): 690.1 [Anion-I]<sup>+</sup>. Anal: calcd for C<sub>32</sub>H<sub>61</sub>I<sub>3</sub>MoN<sub>2</sub>NaO<sub>6</sub>P<sub>2</sub>: C 33.97, H 5.43, N 2.48; found: C 33.88, H 5.49, N 2.30.

### Synthesis of [(PNCNP)MoI]<sub>2</sub>(μ-N<sub>2</sub>) (**7**) from complex **6**

To the 2-MeTHF suspension of complex **6** (11.3 mg, 0.01 mmol) was added freshly prepared sodium amalgam (23 mg, 1 wt%, 0.01 mmol). The mixture was stirred vigorously for 1 h at 18 °C, gradually forming a deep red solution. <sup>31</sup>P{H} NMR recorded in situ showed the production of the N<sub>2</sub> coordinated complex **7**<sup>1</sup> (53% based on complex **6**). <sup>31</sup>P{H} NMR (162 MHz, 2-MeTHF): δ = 131.7 (d, AB, <sup>2</sup>J<sub>P-P</sub> = 124.8 Hz, 2P), 131.1 (d, AB, <sup>2</sup>J<sub>P-P</sub> = 124.4 Hz, 2P) ppm. Single crystals of **7** could be obtained by diffusion of Et<sub>2</sub>O into its 2-MeTHF solution.

## References

1. G. Zhang, T. Liu, J. Song, Y. Quan, L. Jin, M. Si and Q. Liao, *J. Am. Chem. Soc.*, 2022, **144**, 2444.
2. S. A. Garratt, R. P. Hughes, I. Kovacic, A. J. Ward, S. Willemsen and D. Zhang, *J. Am. Chem. Soc.*, 2005, **127**, 15585.
3. SAINT, Program for data correction (Bruker-AXS).
4. G. M. Sheldrick, ShelXT, University of Göttingen, *Acta Crystallogr. Sect. A*, 2015, **71**, 3.
5. G. M. Sheldrick, ShelXT, University of Göttingen, *Acta Crystallogr. Sect. C*, 2015, **71**, 3.
6. W. Wolfsberger, *Z. Anorg. Allg. Chem.* 1978, **438**, 206.



## NMR spectra

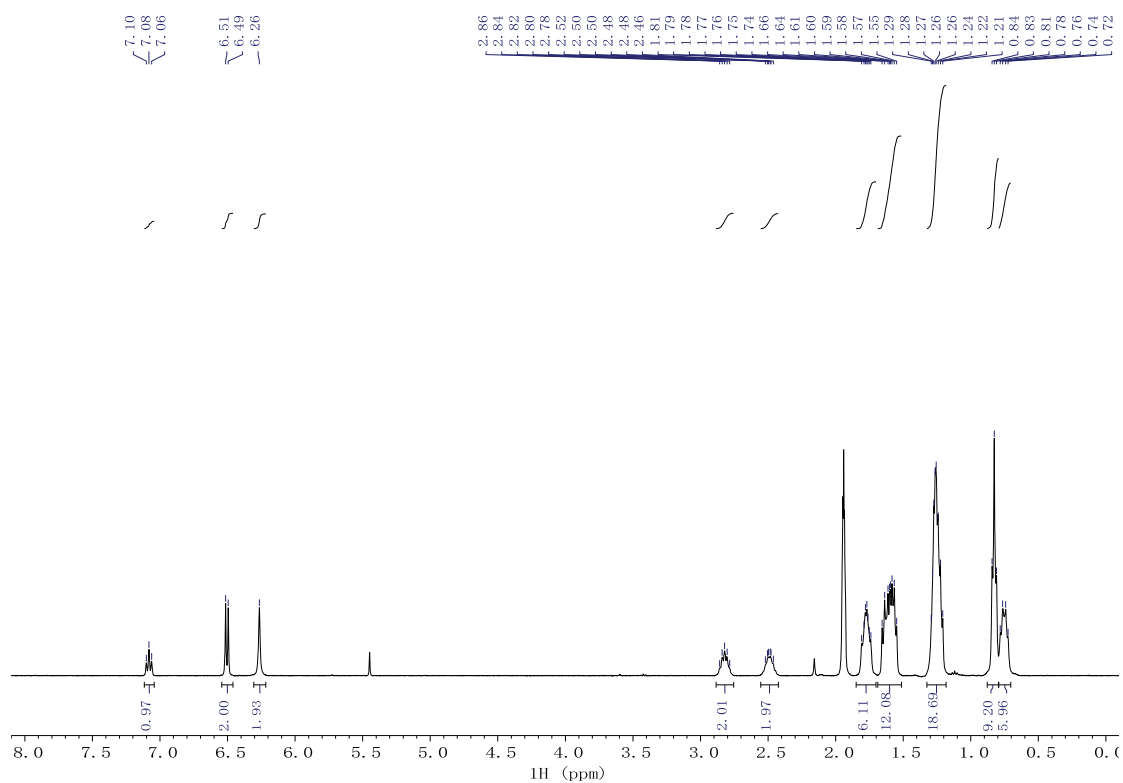

**Figure S1.**  $^1\text{H}$  NMR spectrum of  $[(\text{PNCNP})\text{Mo}(\text{N}=\text{PBu}_3)\text{I}]\text{I}$  (**2a**) in  $\text{CD}_3\text{CN}$

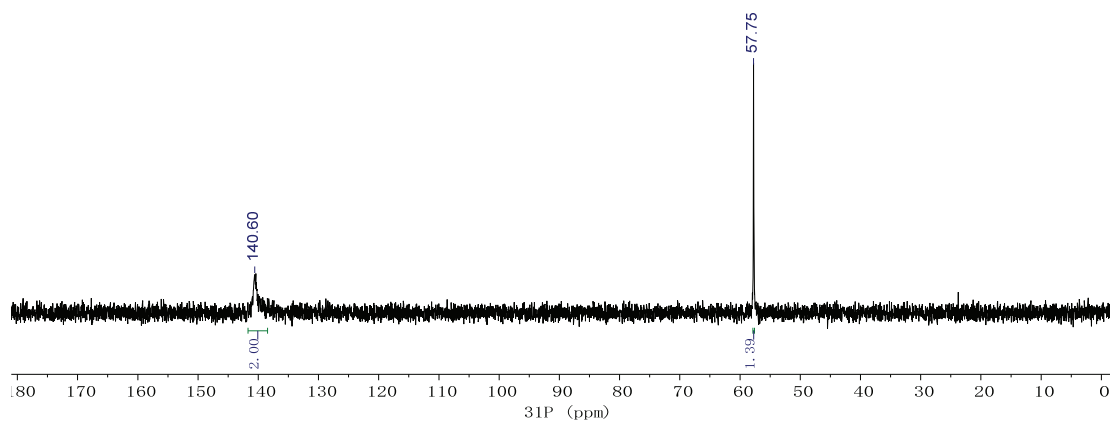

**Figure S2.**  $^{31}\text{P}\{^1\text{H}\}$  NMR spectrum of  $[(\text{PNCNP})\text{Mo}(\text{N}=\text{PBu}_3)\text{I}]\text{I}$  (**2a**) in  $\text{CD}_3\text{CN}$

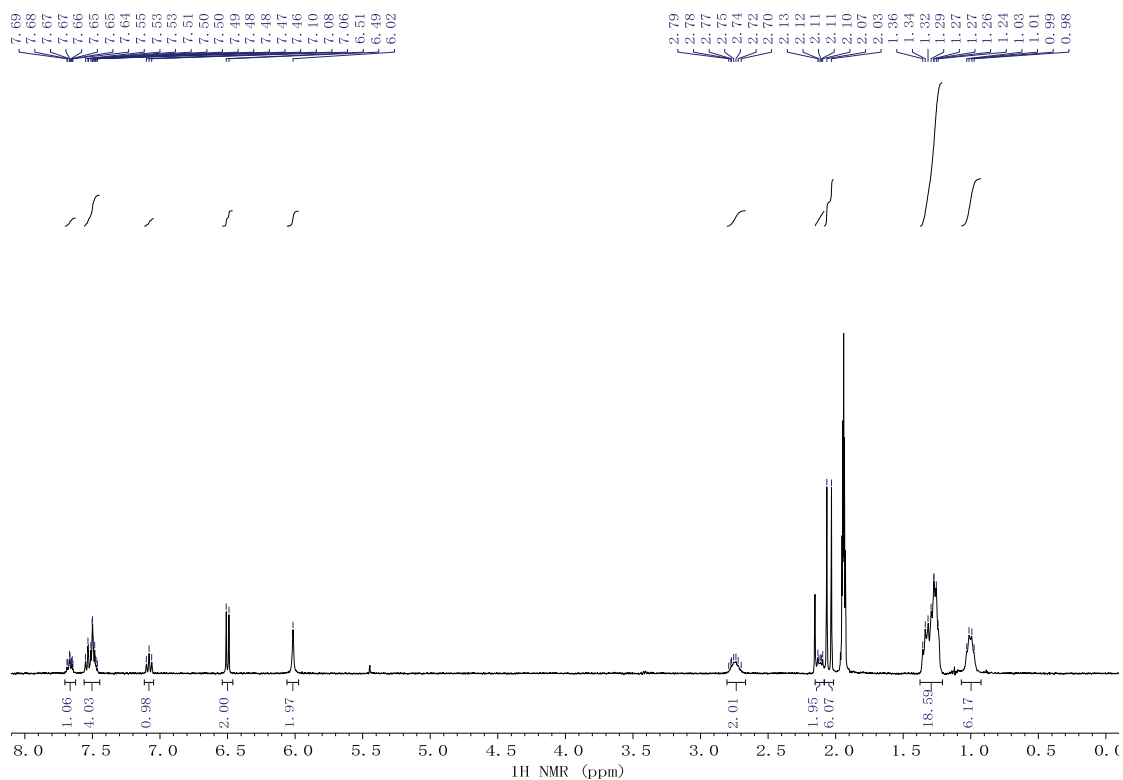

**Figure S3.**  $^1\text{H}$  NMR spectrum of  $[(\text{PNCNP})\text{Mo}(\text{N}=\text{PPhMe}_2)\text{I}]\text{I}$  (**2b**) in  $\text{CD}_3\text{CN}$

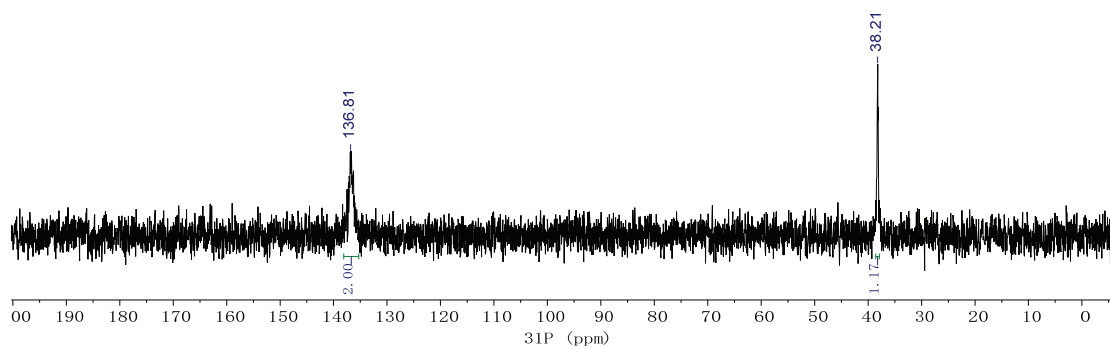

**Figure S4.**  $^{31}\text{P}\{^1\text{H}\}$  NMR spectrum of  $[(\text{PNCNP})\text{Mo}(\text{N}=\text{PPhMe}_2)\text{I}]\text{I}$  (**2b**) in  $\text{CD}_3\text{CN}$

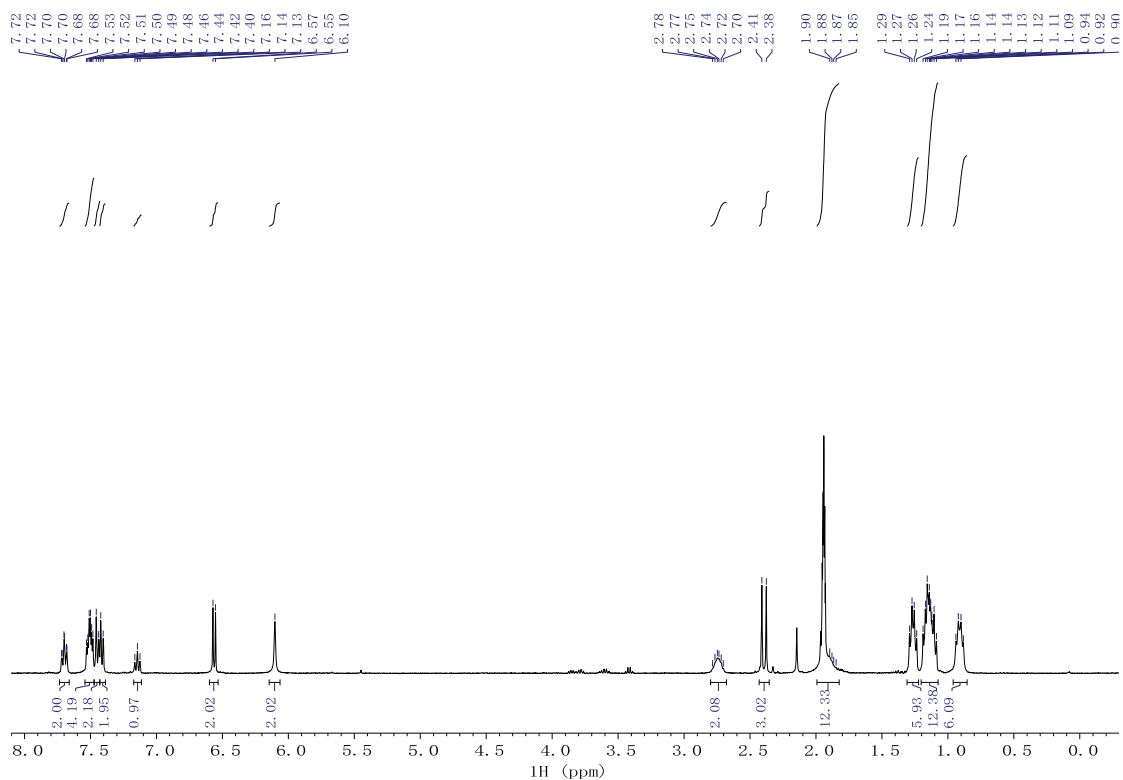

**Figure S5.**  $^1\text{H}$  NMR spectrum of  $[(\text{PNCNP})\text{Mo}(\text{N}=\text{PPh}_2\text{Me})\text{I}]\text{I}$  (**2c**) in  $\text{CD}_3\text{CN}$

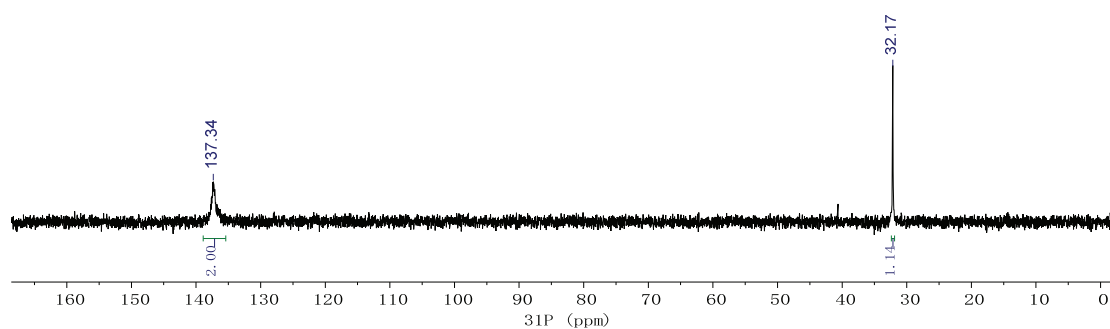

**Figure S6.**  $^{31}\text{P}\{\text{H}\}$  NMR spectrum of  $[(\text{PNCNP})\text{Mo}(\text{N}=\text{PPh}_2\text{Me})\text{I}]\text{I}$  (**2c**) in  $\text{CD}_3\text{CN}$

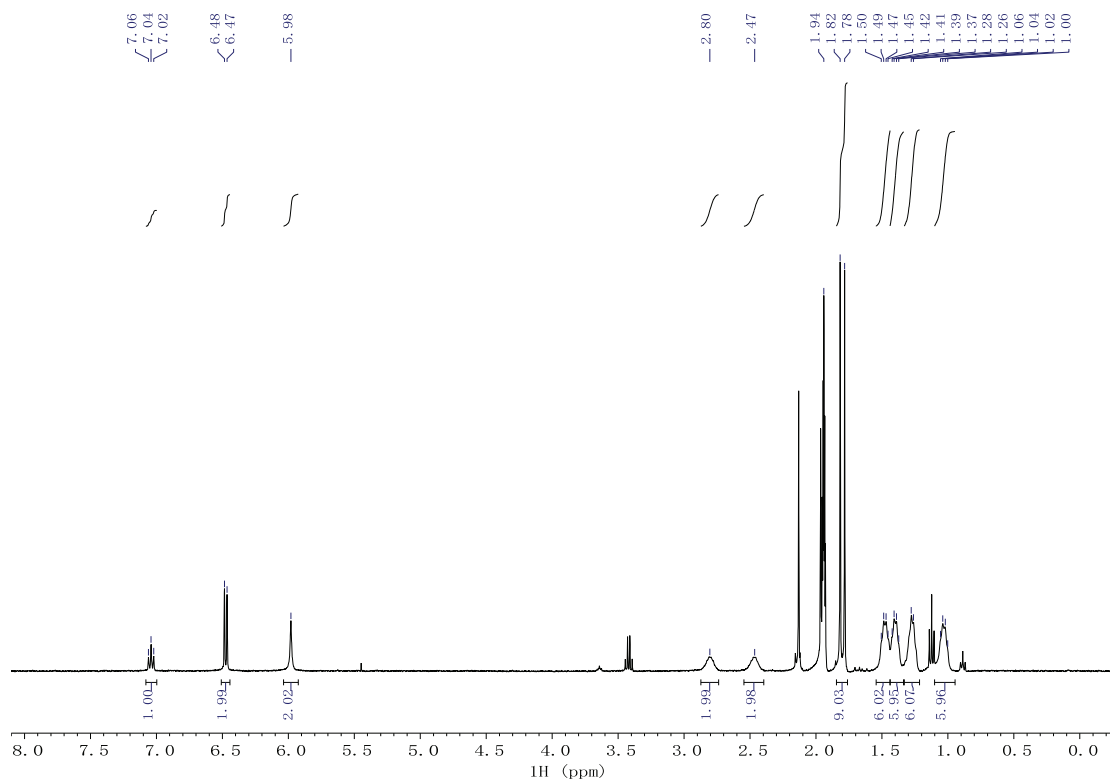

**Figure S7.**  $^1\text{H}$  NMR spectrum of  $[(\text{PNCNP})\text{Mo}(\text{N}=\text{PMe}_3)\text{I}]\text{I}$  (**2d**) in  $\text{CD}_3\text{CN}$

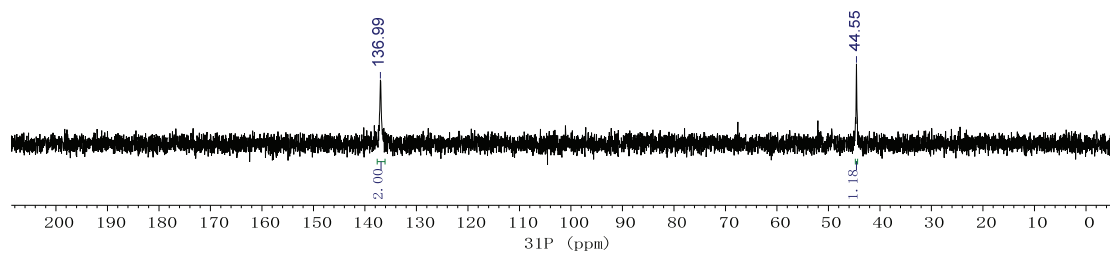

**Figure S8.**  $^{31}\text{P}\{\text{H}\}$  NMR spectrum of  $[(\text{PNCNP})\text{Mo}(\text{N}=\text{PMe}_3)\text{I}]\text{I}$  (**2d**) in  $\text{CD}_3\text{CN}$

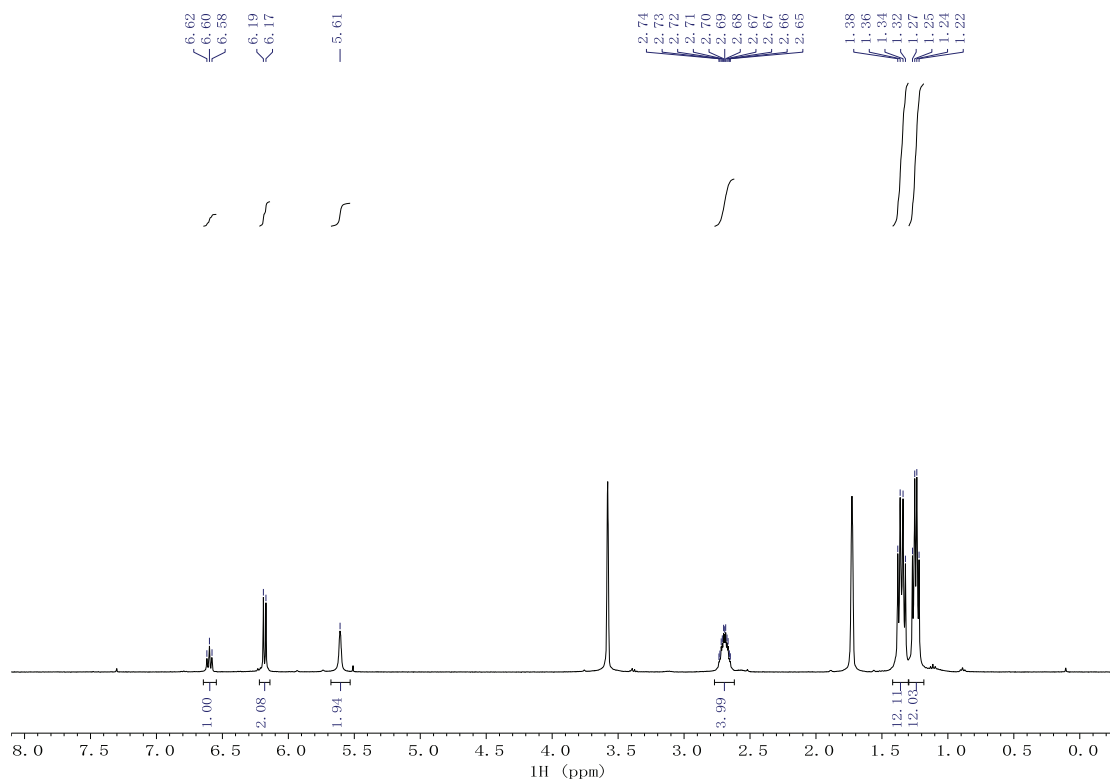

**Figure S9.**  $^1\text{H}$  NMR spectrum of  $(\text{PNCNP})\text{Mo}(\text{CO})_3\text{I}$  (**4**) in  $\text{THF-}d_8$

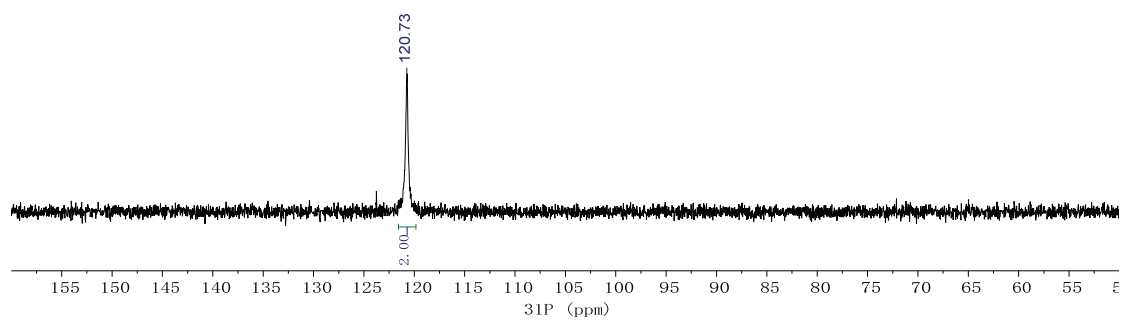

**Figure S10.**  $^{31}\text{P}\{\text{H}\}$  NMR spectrum of  $(\text{PNCNP})\text{Mo}(\text{CO})_3\text{I}$  (**4**) in  $\text{THF-}d_8$

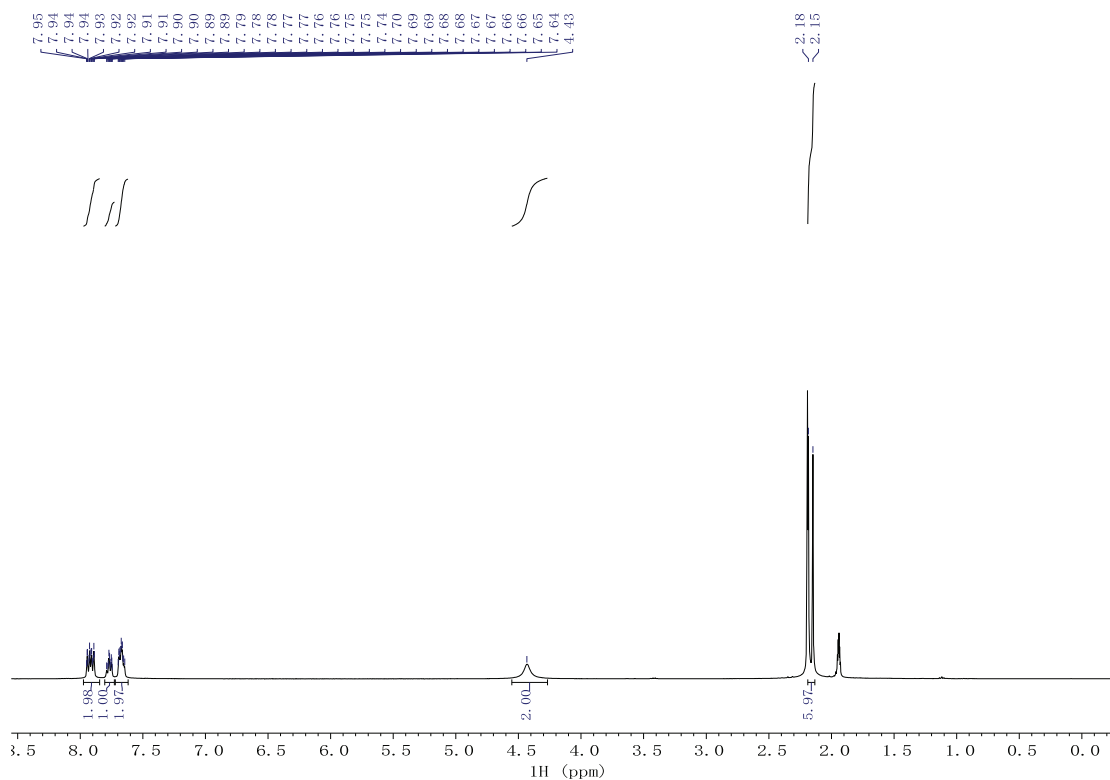

**Figure S11.**  $^1\text{H}$  NMR spectrum of  $[\text{Me}_2\text{PhP}=\text{NH}_2]\text{I}$  (**3b**) in  $\text{CD}_3\text{CN}$

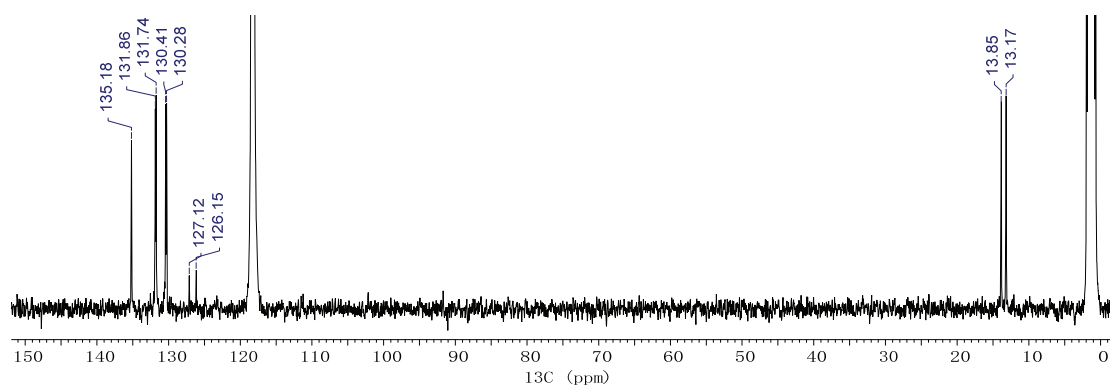

**Figure S12.**  $^{13}\text{C}\{\text{H}\}$  NMR spectrum of  $[\text{Me}_2\text{PhP}=\text{NH}_2]\text{I}$  (**3b**) in  $\text{CD}_3\text{CN}$

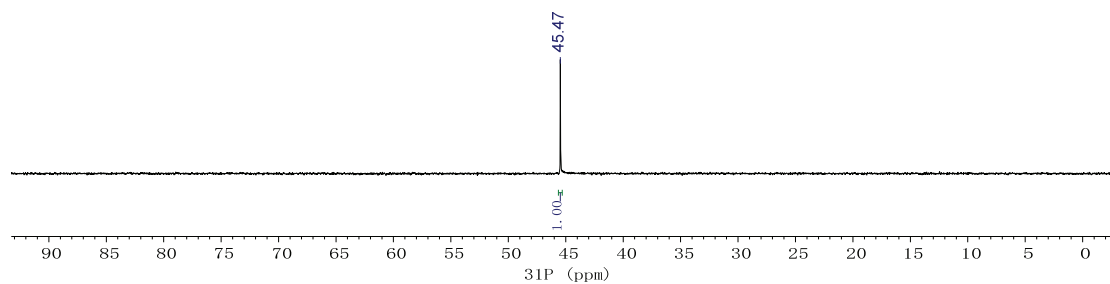

**Figure S13.**  $^{31}\text{P}\{\text{H}\}$  NMR spectrum of  $[\text{Me}_2\text{PhP}=\text{NH}_2]\text{I}$  (**3b**) in  $\text{CD}_3\text{CN}$

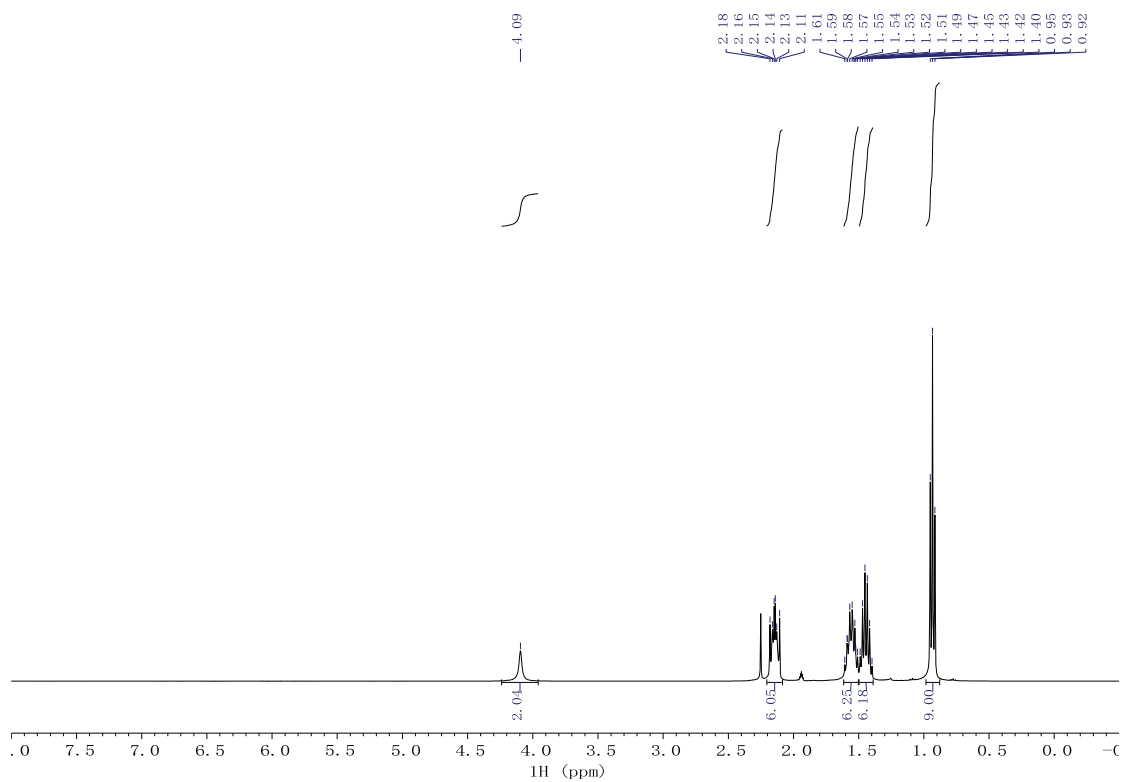

**Figure S14.**  $^1\text{H}$  NMR spectrum of  $[\text{Bu}_3\text{P}=\text{NH}_2]\text{I}$  (**3a**) in  $\text{CD}_3\text{CN}$

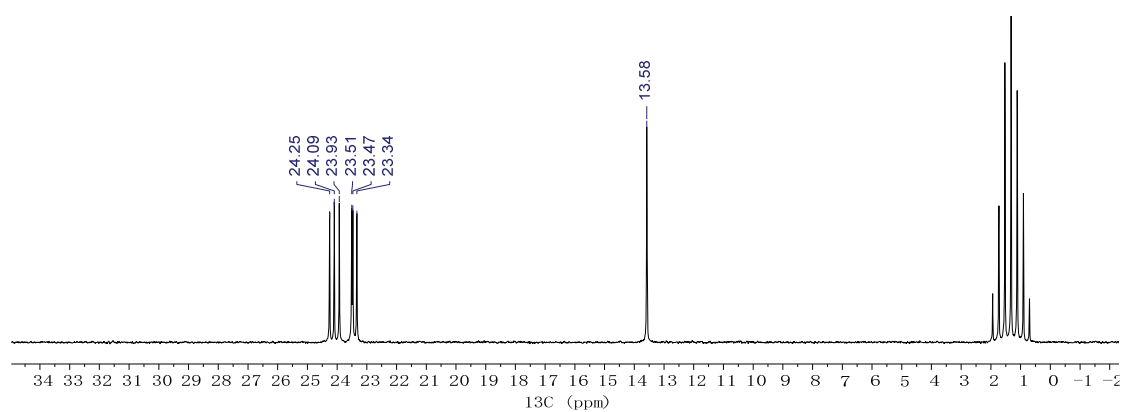

**Figure S15.**  $^{13}\text{C}\{^1\text{H}\}$  NMR spectrum of  $[\text{Bu}_3\text{P}=\text{NH}_2]\text{I}$  (**3a**) in  $\text{CD}_3\text{CN}$

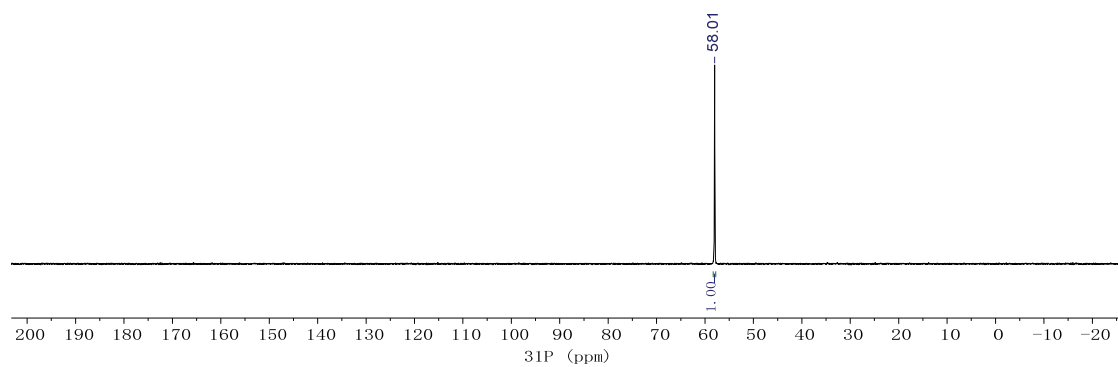

**Figure S16.**  $^{31}\text{P}\{^1\text{H}\}$  NMR spectrum of  $[\text{Bu}_3\text{P}=\text{NH}_2]\text{I}$  (**3a**) in  $\text{CD}_3\text{CN}$

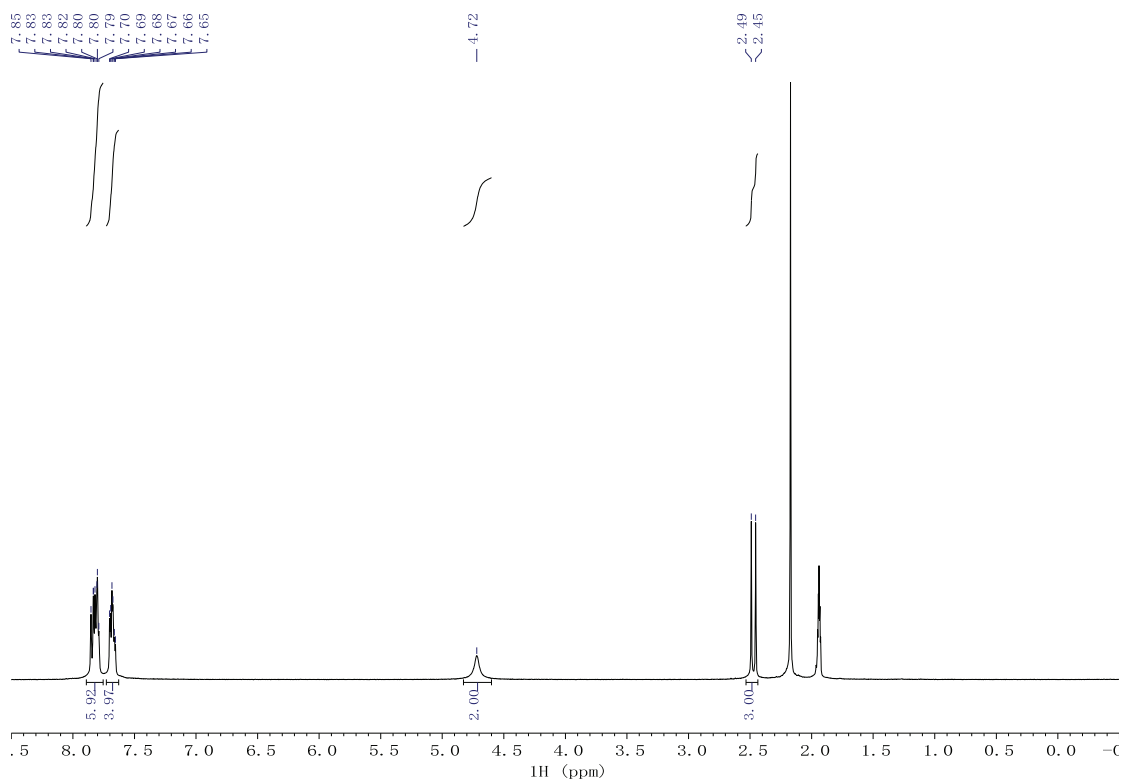

**Figure S17.**  $^1\text{H}$  NMR spectrum of  $[\text{MePh}_2\text{P}=\text{NH}_2]\text{I}$  (**3c**) in  $\text{CD}_3\text{CN}$

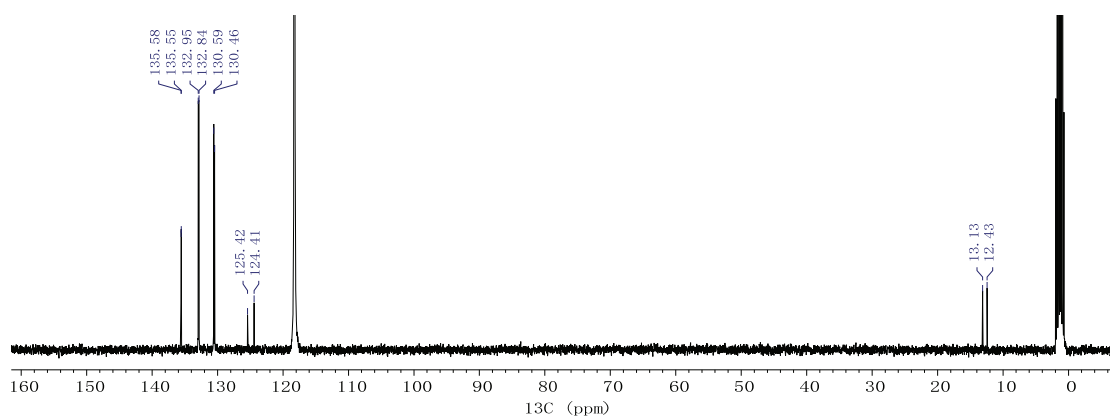

**Figure S18.**  $^{13}\text{C}\{\text{H}\}$  NMR spectrum of  $[\text{MePh}_2\text{P}=\text{NH}_2]\text{I}$  (**3c**) in  $\text{CD}_3\text{CN}$

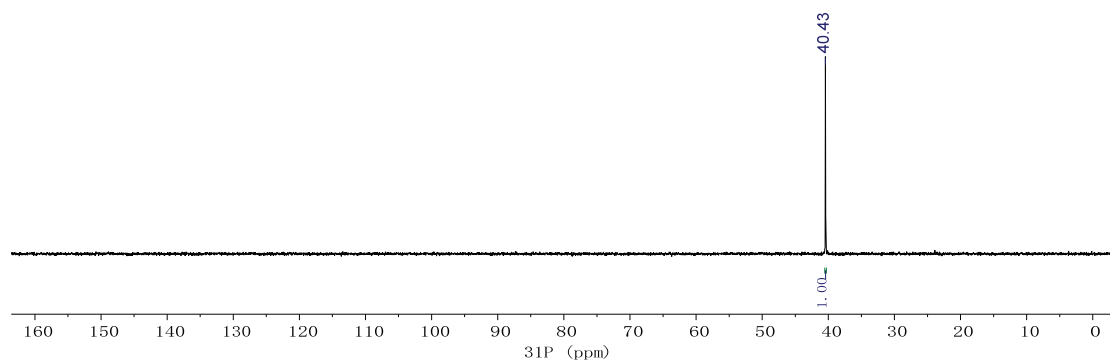

**Figure S19.**  $^{31}\text{P}\{\text{H}\}$  NMR spectrum of  $[\text{MePh}_2\text{P}=\text{NH}_2]\text{I}$  (**3c**) in  $\text{CD}_3\text{CN}$



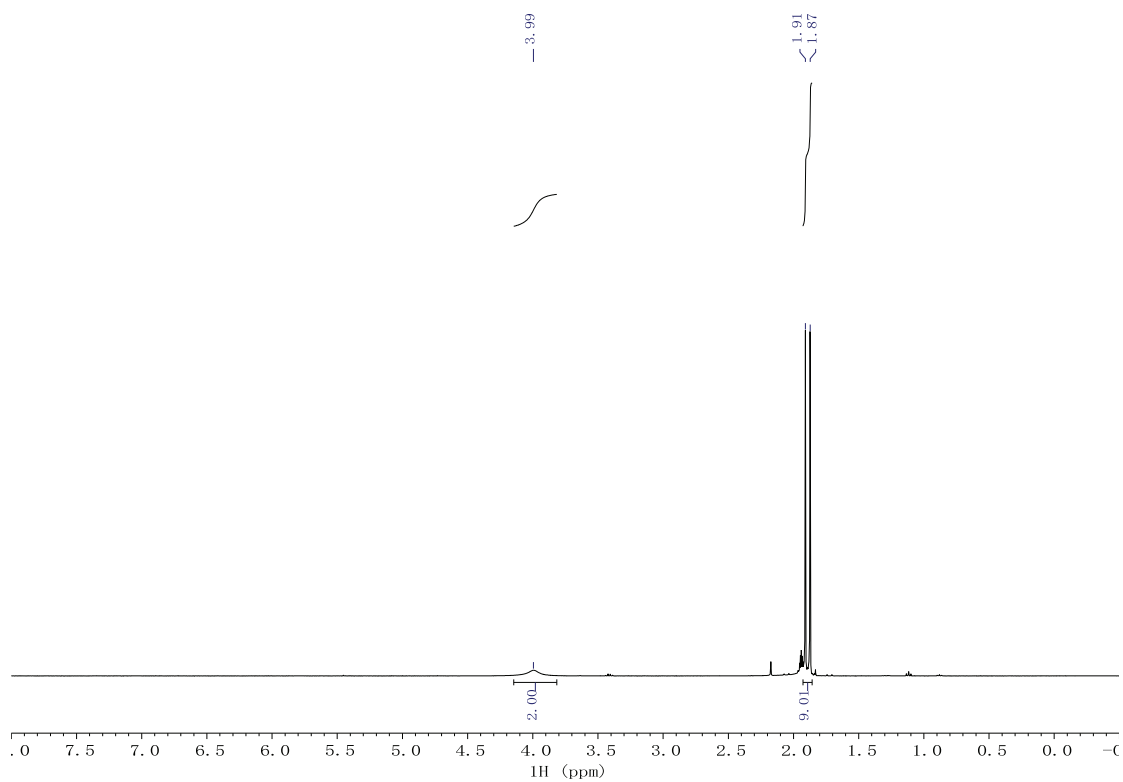

**Figure S20.**  $^1\text{H}$  NMR spectrum of  $[\text{Me}_3\text{P}=\text{NH}_2]\text{I}$  (**3d**) in  $\text{CD}_3\text{CN}$

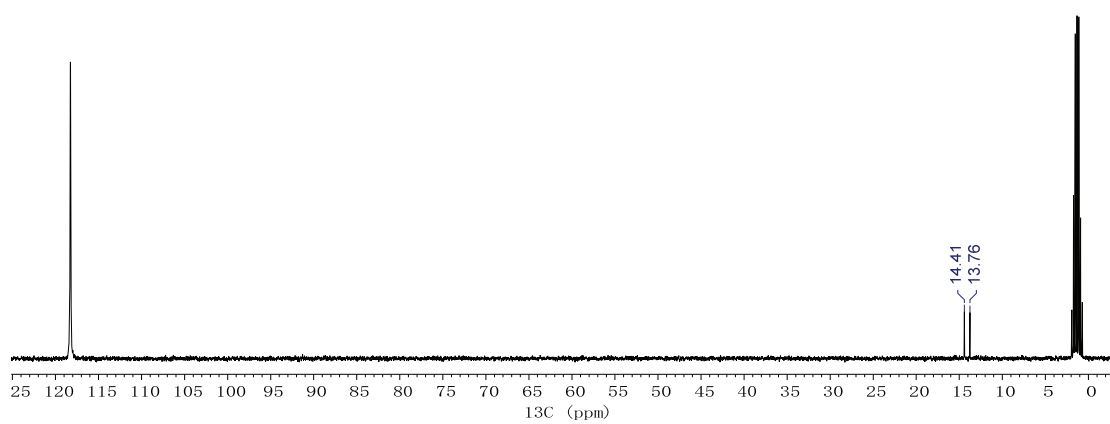

**Figure S21.**  $^{13}\text{C}\{^1\text{H}\}$  NMR spectrum of  $[\text{Me}_3\text{P}=\text{NH}_2]\text{I}$  (**3d**) in  $\text{CD}_3\text{CN}$

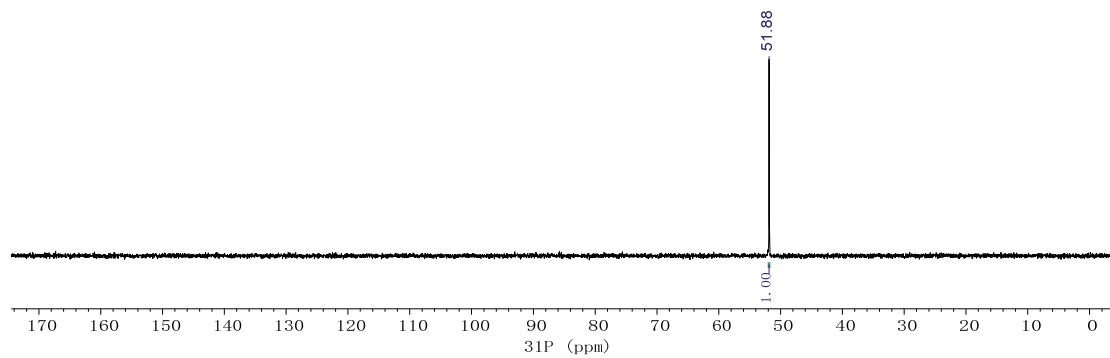

**Figure S22.**  $^{31}\text{P}\{^1\text{H}\}$  NMR spectrum of  $[\text{Me}_3\text{P}=\text{NH}_2]\text{I}$  (**3d**) in  $\text{CD}_3\text{CN}$

**Table S1. [(PNCNP)Mo(N=PBu<sub>3</sub>)I]I (2a)**

|                                   |                                                                                                                                                                       |
|-----------------------------------|-----------------------------------------------------------------------------------------------------------------------------------------------------------------------|
| Molecular formula                 | C <sub>30</sub> H <sub>60</sub> I <sub>2</sub> MoN <sub>3</sub> P <sub>3</sub>                                                                                        |
| Formula weight                    | 905.46                                                                                                                                                                |
| Temperature                       | 120(2) K                                                                                                                                                              |
| Wavelength                        | 0.71073 Å                                                                                                                                                             |
| Crystal size                      | 0.686 × 0.153 × 0.053 mm                                                                                                                                              |
| Crystal system                    | Monoclinic                                                                                                                                                            |
| Space group                       | P2(1)/n                                                                                                                                                               |
| Unit cell parameters              | $a = 11.2557(8)$ Å $\alpha = 90^\circ$<br>$b = 20.5955(16)$ Å $\beta = 101.483(3)^\circ$<br>$c = 17.0359(13)$ Å $\gamma = 90^\circ$<br>$V = 3870.2(5)$ Å <sup>3</sup> |
| Z                                 | 4                                                                                                                                                                     |
| F(000)                            | 1816                                                                                                                                                                  |
| Density (calcd)                   | 1.554 g/cm <sup>3</sup>                                                                                                                                               |
| Absorption coefficient            | 2.081 mm <sup>-1</sup>                                                                                                                                                |
| Theta range for data collection   | 2.094 to 25.082°                                                                                                                                                      |
| Limiting indices                  | -13 ≤ h ≤ 13, -24 ≤ k ≤ 24, -20 ≤ l ≤ 18                                                                                                                              |
| Reflections collected / unique    | 28227 / 6841 [R(int) = 0.0798]                                                                                                                                        |
| Completeness to theta = 25.082°   | 99.5%                                                                                                                                                                 |
| Refinement method                 | Full-matrix least-squares on F <sup>2</sup>                                                                                                                           |
| Data / restraints / parameters    | 6841 / 0 / 352                                                                                                                                                        |
| Goodness-of-fit on F <sup>2</sup> | 1.032                                                                                                                                                                 |
| Final R indices [I > 2σ(I)]       | R1 = 0.0425, wR2 = 0.1049                                                                                                                                             |
| R indices (all data)              | R1 = 0.0493, wR2 = 0.1097                                                                                                                                             |
| Largest diff. peak and hole       | 1.605 and -1.275 eÅ <sup>-3</sup>                                                                                                                                     |

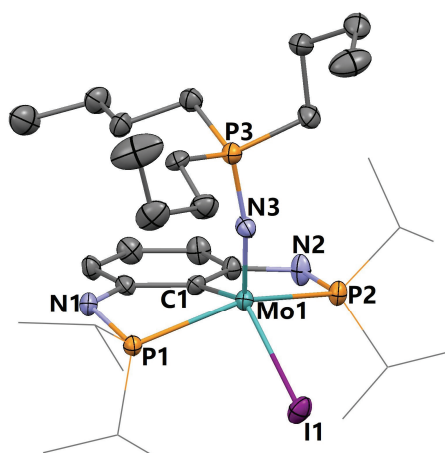

Selected bond lengths (Å) and angles (°): Mo1-I1 2.7421(5), Mo1-P1 2.4400(12), Mo1-P2 2.4612(12), Mo1-C1 2.117(4), Mo1-N3 1.771(3), P3-N3 1.631(4), N3-Mo1-I1 114.33(12), P1-Mo1-I1 90.36(3), P2-Mo1-I1 91.07(3), C1-Mo1-I1 132.56(11), C1-Mo1-P1 75.66(12), P1-Mo1-P2 143.24(4), N3-Mo1-P1 104.38(12), C1-Mo1-P2 76.51(12), N3-Mo1-P2 108.36(12), N3-Mo1-C1 113.04(16), P3-N3-Mo1 165.0(3).

**Table S2. [(PNCNP)Mo(N=PPhMe<sub>2</sub>)I]I (2b)**

|                                   |                                                                                                                                                                                                     |
|-----------------------------------|-----------------------------------------------------------------------------------------------------------------------------------------------------------------------------------------------------|
| Molecular formula                 | C <sub>26</sub> H <sub>44</sub> I <sub>2</sub> MoN <sub>3</sub> P <sub>3</sub>                                                                                                                      |
| Formula weight                    | 841.29                                                                                                                                                                                              |
| Temperature                       | 120(2) K                                                                                                                                                                                            |
| Wavelength                        | 0.71073 Å                                                                                                                                                                                           |
| Crystal size                      | 0.166 × 0.097 × 0.036 mm                                                                                                                                                                            |
| Crystal system                    | Monoclinic                                                                                                                                                                                          |
| Space group                       | P2(1)/c                                                                                                                                                                                             |
| Unit cell parameters              | $a = 17.0447(19) \text{ \AA}$ $\alpha = 90^\circ$<br>$b = 12.5657(13) \text{ \AA}$ $\beta = 105.891(2)^\circ$<br>$c = 16.0127(17) \text{ \AA}$ $\gamma = 90^\circ$<br>$V = 3298.5(6) \text{ \AA}^3$ |
| Z                                 | 4                                                                                                                                                                                                   |
| F(000)                            | 1656                                                                                                                                                                                                |
| Density (calcd)                   | 1.694 g/cm <sup>3</sup>                                                                                                                                                                             |
| Absorption coefficient            | 2.434 mm <sup>-1</sup>                                                                                                                                                                              |
| Theta range for data collection   | 2.240 to 24.414°                                                                                                                                                                                    |
| Limiting indices                  | -19 ≤ h ≤ 19, -14 ≤ k ≤ 14, -18 ≤ l ≤ 18                                                                                                                                                            |
| Reflections collected / unique    | 25483 / 5427 [R(int) = 0.0991]                                                                                                                                                                      |
| Completeness to theta = 24.414°   | 99.6%                                                                                                                                                                                               |
| Refinement method                 | Full-matrix least-squares on F <sup>2</sup>                                                                                                                                                         |
| Data / restraints / parameters    | 5427 / 0 / 316                                                                                                                                                                                      |
| Goodness-of-fit on F <sup>2</sup> | 1.013                                                                                                                                                                                               |
| Final R indices [I > 2σ(I)]       | R1 = 0.0508, wR2 = 0.1123                                                                                                                                                                           |
| R indices (all data)              | R1 = 0.0745, wR2 = 0.1261                                                                                                                                                                           |
| Largest diff. peak and hole       | 0.799 and -0.892 eÅ <sup>-3</sup>                                                                                                                                                                   |

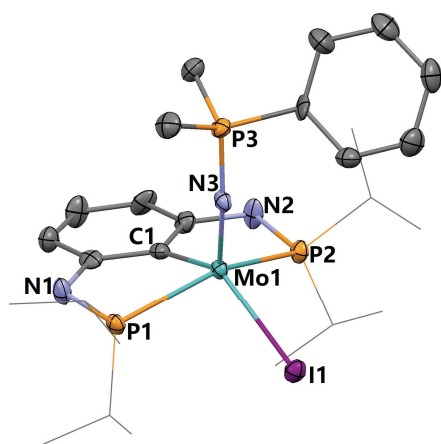

Selected bond lengths (Å) and angles (°): Mo1-I1 2.7600(8), Mo1-P1 2.443(2), Mo1-P2 2.469(2), Mo1-C1 2.129(7), Mo1-N3 1.774(6), P3-N3 1.621(6), N3-Mo1-I1 110.0(2), P1-Mo1-I1 92.98(5), P2-Mo1-I1 90.51(5), C1-Mo1-I1 137.34(19), C1-Mo1-P1 76.8(2), P1-Mo1-P2 142.74(7), N3-Mo1-P1 104.82(19), C1-Mo1-P2 75.7(2), N3-Mo1-P2 108.72(19), N3-Mo1-C1 112.7(3), P3-N3-Mo1 165.3(4).

**Table S3. [(PNCNP)Mo(N=PPh<sub>2</sub>Me)I]I (2c)**

|                                   |                                                                                                                                                                      |
|-----------------------------------|----------------------------------------------------------------------------------------------------------------------------------------------------------------------|
| Molecular formula                 | C <sub>31</sub> H <sub>46</sub> I <sub>2</sub> MoN <sub>3</sub> P <sub>3</sub>                                                                                       |
| Formula weight                    | 903.36                                                                                                                                                               |
| Temperature                       | 300(2) K                                                                                                                                                             |
| Wavelength                        | 1.54178 Å                                                                                                                                                            |
| Crystal size                      | 0.228 × 0.202 × 0.031 mm                                                                                                                                             |
| Crystal system                    | Monoclinic                                                                                                                                                           |
| Space group                       | C2/c                                                                                                                                                                 |
| Unit cell parameters              | $a = 32.1147(11)$ Å $\alpha = 90^\circ$<br>$b = 12.0242(4)$ Å $\beta = 103.547(2)^\circ$<br>$c = 19.6739(7)$ Å $\gamma = 90^\circ$<br>$V = 3298.5(6)$ Å <sup>3</sup> |
| Z                                 | 8                                                                                                                                                                    |
| F(000)                            | 3568                                                                                                                                                                 |
| Density (calcd)                   | 1.625 g/cm <sup>3</sup>                                                                                                                                              |
| Absorption coefficient            | 17.436 mm <sup>-1</sup>                                                                                                                                              |
| Theta range for data collection   | 3.939 to 63.015°                                                                                                                                                     |
| Limiting indices                  | -35 ≤ h ≤ 36, -13 ≤ k ≤ 13, -22 ≤ l ≤ 20                                                                                                                             |
| Reflections collected / unique    | 32171 / 5755 [R(int) = 0.0639]                                                                                                                                       |
| Completeness to theta = 63.015°   | 96.3%                                                                                                                                                                |
| Refinement method                 | Full-matrix least-squares on F <sup>2</sup>                                                                                                                          |
| Data / restraints / parameters    | 5755 / 48 / 361                                                                                                                                                      |
| Goodness-of-fit on F <sup>2</sup> | 1.049                                                                                                                                                                |
| Final R indices [I > 2σ(I)]       | R1 = 0.0628, wR2 = 0.1643                                                                                                                                            |
| R indices (all data)              | R1 = 0.0840, wR2 = 0.1896                                                                                                                                            |
| Largest diff. peak and hole       | 1.385 and -1.234 eÅ <sup>-3</sup>                                                                                                                                    |

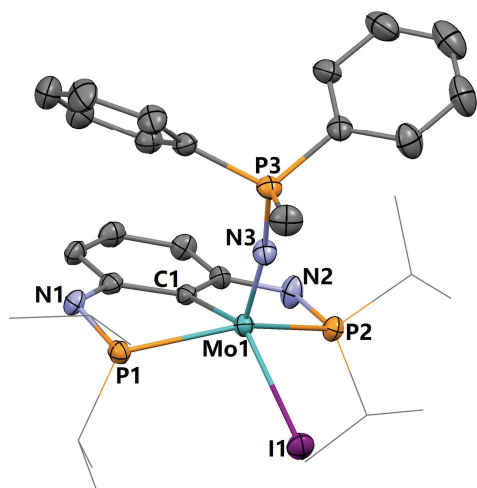

Selected bond lengths (Å) and angles (°): Mo1-I1 2.7484(9), Mo1-P1 2.461(2), Mo1-P2 2.454(2), Mo1-C1 2.125(9), Mo1-N3 1.766(7), P3-N3 1.613(8), N3-Mo1-I1 108.8(3), P1-Mo1-I1 96.19(6), P2-Mo1-I1 90.32(6), C1-Mo1-I1 138.7(2), C1-Mo1-P1 76.0(2), P2-Mo1-P1 144.30(8), N3-Mo1-P1 103.9(2), C1-Mo1-P2 76.1(2), N3-Mo1-P2 107.0(3), N3-Mo1-C1 112.4(3), P3-N3-Mo1 169.2(5).

**Table S4. [Me<sub>2</sub>PhP=NH<sub>2</sub>]I (3b)**

|                                   |                                                                                                                                                         |
|-----------------------------------|---------------------------------------------------------------------------------------------------------------------------------------------------------|
| Molecular formula                 | C <sub>8</sub> H <sub>13</sub> INP                                                                                                                      |
| Formula weight                    | 281.06                                                                                                                                                  |
| Temperature                       | 274(2) K                                                                                                                                                |
| Wavelength                        | 0.71073 Å                                                                                                                                               |
| Crystal size                      | 0.656 × 0.098 × 0.087 mm                                                                                                                                |
| Crystal system                    | Orthorhombic                                                                                                                                            |
| Space group                       | Pnma                                                                                                                                                    |
| Unit cell parameters              | $a = 12.818(7)$ Å $\alpha = 90^\circ$<br>$b = 6.815(3)$ Å $\beta = 90^\circ$<br>$c = 12.453(5)$ Å $\gamma = 90^\circ$<br>$V = 1093.6(9)$ Å <sup>3</sup> |
| Z                                 | 4                                                                                                                                                       |
| F(000)                            | 544                                                                                                                                                     |
| Density (calcd)                   | 1.707 g/cm <sup>3</sup>                                                                                                                                 |
| Absorption coefficient            | 3.021 mm <sup>-1</sup>                                                                                                                                  |
| Theta range for data collection   | 3.179 to 24.468°                                                                                                                                        |
| Limiting indices                  | -14 ≤ h ≤ 14, -7 ≤ k ≤ 7, -14 ≤ l ≤ 14                                                                                                                  |
| Reflections collected / unique    | 4626 / 966 [R(int) = 0.0658]                                                                                                                            |
| Completeness to theta = 24.468°   | 98.0%                                                                                                                                                   |
| Refinement method                 | Full-matrix least-squares on F <sup>2</sup>                                                                                                             |
| Data / restraints / parameters    | 966 / 1 / 69                                                                                                                                            |
| Goodness-of-fit on F <sup>2</sup> | 1.066                                                                                                                                                   |
| Final R indices [I > 2σ(I)]       | R1 = 0.0349, wR2 = 0.0843                                                                                                                               |
| R indices (all data)              | R1 = 0.0444, wR2 = 0.0907                                                                                                                               |
| Largest diff. peak and hole       | 0.919 and -0.559 eÅ <sup>-3</sup>                                                                                                                       |

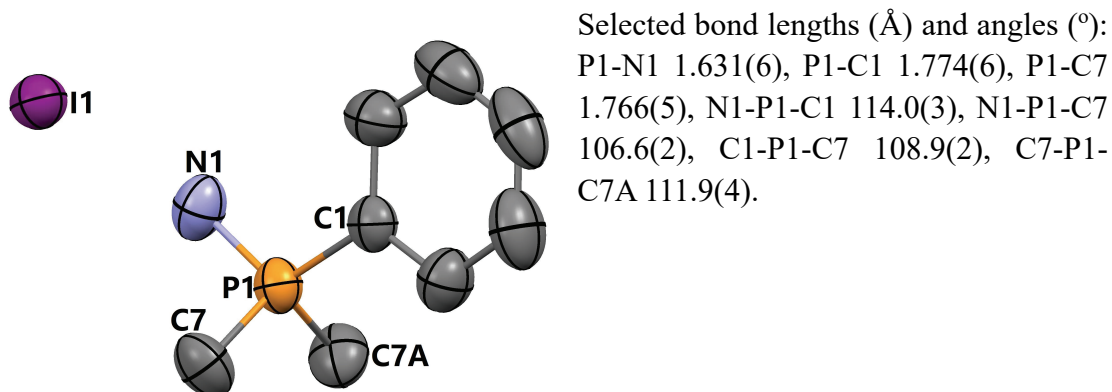

**Table S5. (PNCNP)Mo(CO)<sub>3</sub>I (4)**

|                                   |                                                                                                                                                                                                |
|-----------------------------------|------------------------------------------------------------------------------------------------------------------------------------------------------------------------------------------------|
| Molecular formula                 | C <sub>21</sub> H <sub>33</sub> IMoN <sub>2</sub> O <sub>3</sub> P <sub>2</sub>                                                                                                                |
| Formula weight                    | 646.27                                                                                                                                                                                         |
| Temperature                       | 170(2) K                                                                                                                                                                                       |
| Wavelength                        | 1.54178 Å                                                                                                                                                                                      |
| Crystal size                      | 0.150 × 0.120 × 0.100 mm                                                                                                                                                                       |
| Crystal system                    | Orthorhombic                                                                                                                                                                                   |
| Space group                       | Fdd2                                                                                                                                                                                           |
| Unit cell parameters              | $a = 25.9591(3) \text{ \AA}$ $\alpha = 90^\circ$<br>$b = 13.17384(15) \text{ \AA}$ $\beta = 90^\circ$<br>$c = 14.86566(17) \text{ \AA}$ $\gamma = 90^\circ$<br>$V = 5083.77(10) \text{ \AA}^3$ |
| Z                                 | 8                                                                                                                                                                                              |
| F(000)                            | 2576                                                                                                                                                                                           |
| Density (calcd)                   | 1.689 g/cm <sup>3</sup>                                                                                                                                                                        |
| Absorption coefficient            | 15.143 mm <sup>-1</sup>                                                                                                                                                                        |
| Theta range for data collection   | 4.798 to 75.437°                                                                                                                                                                               |
| Limiting indices                  | -32 ≤ h ≤ 25, -16 ≤ k ≤ 16, -18 ≤ l ≤ 18                                                                                                                                                       |
| Reflections collected / unique    | 14290 / 2568 [R(int) = 0.0606]                                                                                                                                                                 |
| Completeness to theta = 67.679°   | 99.8%                                                                                                                                                                                          |
| Refinement method                 | Full-matrix least-squares on F <sup>2</sup>                                                                                                                                                    |
| Data / restraints / parameters    | 2568 / 1 / 151                                                                                                                                                                                 |
| Goodness-of-fit on F <sup>2</sup> | 1.087                                                                                                                                                                                          |
| Final R indices [I > 2σ(I)]       | R1 = 0.0374, wR2 = 0.1007                                                                                                                                                                      |
| R indices (all data)              | R1 = 0.0378, wR2 = 0.1010                                                                                                                                                                      |
| Largest diff. peak and hole       | 0.966 and -0.743 eÅ <sup>-3</sup>                                                                                                                                                              |

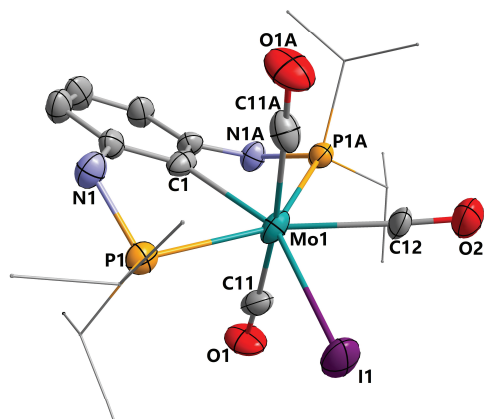

Selected bond lengths (Å) and angles (°): Mo1-I1 2.8583(10), Mo1-C1 2.271(9), Mo1-C11 2.027(7), Mo1-C12 2.128(12), Mo1-P1 2.5215(16), C11-O1 1.143(9), C12-O2 1.145(17) I1-Mo1-C11 89.5(2), I1-Mo1-C11A 96.3(2), I1-Mo1-C1 151.89(2), I1-Mo1-P1 137.01(4), I1-Mo1-P1A 82.11(4), I1-Mo1-C12 69.4(3), P1-Mo1-C1 70.32(4), P1-Mo1-C11 84.61(16), P1-Mo1-C11A 93.19(17), P1-Mo1-C12 70.4(3), P1-Mo1-P1A 140.63(7), C1-Mo1-C11 86.8(2), C1-Mo1-C12 138.5(3), P1A-Mo1-C12 147.2(3), C11-Mo1-C11A 173.5(4), C11-Mo1-C12 102.2(4), C11A-Mo1-C12 82.7(4).

**Table S6. [Na(15-crown-5)(THF)][(PNCNP)MoI<sub>3</sub>] (6)**

|                                              |                                                                                                                                                                     |                     |
|----------------------------------------------|---------------------------------------------------------------------------------------------------------------------------------------------------------------------|---------------------|
| Molecular formula                            | C <sub>18</sub> H <sub>33</sub> I <sub>3</sub> MoN <sub>2</sub> P <sub>2</sub> ·Na(C <sub>14</sub> H <sub>28</sub> O <sub>6</sub> )·C <sub>4</sub> H <sub>8</sub> O |                     |
| Formula weight                               | 1203.50                                                                                                                                                             |                     |
| Temperature                                  | 150(2) K                                                                                                                                                            |                     |
| Wavelength                                   | 1.54178 Å                                                                                                                                                           |                     |
| Crystal size                                 | 0.120 × 0.100 × 0.080 mm                                                                                                                                            |                     |
| Crystal system                               | Orthorhombic                                                                                                                                                        |                     |
| Space group                                  | P2(1)2(1)2(1)                                                                                                                                                       |                     |
| Unit cell parameters                         | $a = 11.1871(3)$ Å                                                                                                                                                  | $\alpha = 90^\circ$ |
|                                              | $b = 18.9167(5)$ Å                                                                                                                                                  | $\beta = 90^\circ$  |
|                                              | $c = 22.6936(6)$ Å                                                                                                                                                  | $\gamma = 90^\circ$ |
|                                              | $V = 4802.5(2)$ Å <sup>3</sup>                                                                                                                                      |                     |
| <i>Z</i>                                     | 4                                                                                                                                                                   |                     |
| <i>F</i> (000)                               | 2388                                                                                                                                                                |                     |
| Density (calcd)                              | 1.665 g/cm <sup>3</sup>                                                                                                                                             |                     |
| Absorption coefficient                       | 18.437 mm <sup>-1</sup>                                                                                                                                             |                     |
| Theta range for data collection              | 3.041 to 66.598°                                                                                                                                                    |                     |
| Limiting indices                             | -13 ≤ <i>h</i> ≤ 13, -21 ≤ <i>k</i> ≤ 22, -27 ≤ <i>l</i> ≤ 27                                                                                                       |                     |
| Reflections collected / unique               | 73210 / 8405 [R(int) = 0.0619]                                                                                                                                      |                     |
| Completeness to theta = 66.598°              | 99.8%                                                                                                                                                               |                     |
| Refinement method                            | Full-matrix least-squares on <i>F</i> <sup>2</sup>                                                                                                                  |                     |
| Data / restraints / parameters               | 8405 / 183 / 507                                                                                                                                                    |                     |
| Goodness-of-fit on <i>F</i> <sup>2</sup>     | 1.032                                                                                                                                                               |                     |
| Final R indices [ <i>I</i> > 2σ( <i>I</i> )] | R1 = 0.0220, wR2 = 0.0557                                                                                                                                           |                     |
| R indices (all data)                         | R1 = 0.0230, wR2 = 0.0561                                                                                                                                           |                     |
| Largest diff. peak and hole                  | 0.832 and -0.709 eÅ <sup>-3</sup>                                                                                                                                   |                     |

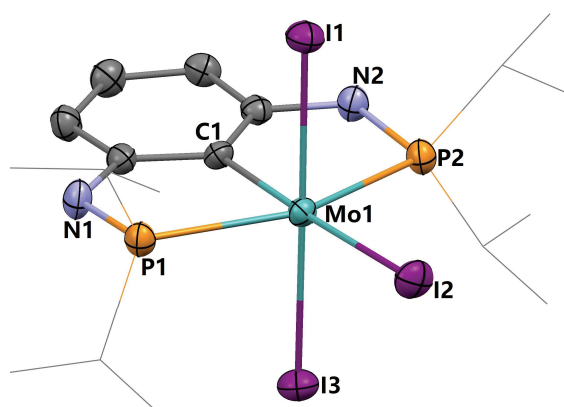

Selected bond lengths (Å) and angles (°):  
Mo1-I1 2.7834(5), Mo1-I2 2.8808(5),  
Mo1-I3 2.7910(5), Mo1-C1 2.159(4),  
Mo1-P1 2.5375(12), Mo1-P2 2.5391(12),  
I1-Mo1-I2 89.385(13), I1-Mo1-I3  
179.129(17), I1-Mo1-P1 90.91(3), I1-  
Mo1-P2 88.55(3), I1-Mo1-C1 87.76(12),  
I2-Mo1-I3 91.486(14) I2-Mo1-P1  
102.38(3), I2-Mo1-P2 102.88(3), I2-  
Mo1-C1 177.14(12), I3-Mo1-P1  
88.91(3), I3-Mo1-P2 91.24(3), I3-Mo1-  
C1 91.37(12), C1-Mo1-P1 77.47(13), C1-Mo1-P2 77.27(13), P2-Mo1-P1 154.73(4).
